# Supplementary material for: Accuracy of lung ultrasonography in the hands of non-imaging specialists to diagnose and assess the severity of community-acquired pneumonia in adults: a systematic review
Source: PubMed Central journal article supplement — BMJ Open. 2020 Jun 17;10(6):e036067. doi: 10.1136/bmjopen-2019-036067 (PMC7304808; doi:10.1136/bmjopen-2019-036067), 2020-06-17
Supplement: bmjopen-2019-036067supp001.pdf [file bmjopen-2019-036067supp001.pdf]

Supplemental materials for:

Strøm JJ, Haugen PS, Hansen MP, Graumann O, Jensen MB, Andersen CA.

Accuracy of Lung Ultrasonography in the Hands of Non-Specialists to Diagnose and Assess the Severity of Community-Acquired Pneumonia in Adults: A Systematic Review

---

## e-Appendix 1. Search string.

This appendix includes a full description of the literature search conducted in MEDLINE via OVID, EMBASE via OVID, CINAHL via Ebsco, Web of Science, and Cochrane Central Register of Controlled Trials (CENTRAL) on August 10<sup>th</sup> 2017 and updated on May 16<sup>th</sup> 2019. The search was conducted by the principal investigator (Julie Jepsen Strøm) and a medical librarian at the medical library at Aalborg University Hospital, Aalborg, Denmark. All databases were searched from inception date until May 16<sup>th</sup> 2019.

| Database       | Interface | Number of hits 08.10.2017 | Number of hits 05.16.2019 |
|----------------|-----------|---------------------------|---------------------------|
| EMBASE         | OVID      | 4255                      | 1407                      |
| MEDLINE        | OVID      | 958                       | 242                       |
| Cinahl         | Ebsco     | 99                        | 67                        |
| Web of Science |           | 884                       | 320                       |
| Cochrane       |           | 29                        | 11                        |

### Embase 08.10.2017 (updated 05.16.2019)

Interface: OVID

Search: Embase via OVID

Date: 10.08.17

Database: Embase <1974 to 2017 Week 32>

Search Strategy:

- 
- 1 exp pneumonia/ (251394)
  - 2 ((lung or pulmon\*) adj3 inflammation\*).mp. (18840)
  - 3 inflammatory lung disease\*.mp. (1603)
  - 4 lobitis.mp. (19)
  - 5 peripneumonia\*.mp. (18)
  - 6 pleuropneumonia\*.mp. (2829)
  - 7 (pneumonic adj3 (lung or pleuri\*)).mp. (170)
  - 8 pneumonitis.mp. (21629)
  - 9 acute chest syndrome.mp. (2070)
  - 10 acute respiratory syndrome.mp. (9328)

- 11 bronchopneumonia\*.mp. (8482)
- 12 lung infiltrate\*.mp. (11288)
- 13 legionnaire disease\*.mp. (5515)
- 14 pulmonary candidiasis.mp. (259)
- 15 or/1-14 (271290)
- 16 exp animal/ (23458059)
- 17 exp human/ (18773067)
- 18 16 not 17 (4684992)
- 19 ((doptone\* or echograph\* or echogram\* or echoscop\* or echosound\* or sonogram\* or sonograph\* or ultrasonic or ultrasonograph\* or ultrasound\*) adj (chest or lung or thoracic)).mp. (415)
- 20 (chest or lung or thoracic).mp. (1664235)
- 21 exp echography/ (640345)
- 22 20 and 21 (85682)
- 23 19 or 22 (85829)
- 24 15 and 23 (4463)
- 25 24 not 18 (4386)
- 26 remove duplicates from 25 (4255)

## MEDLINE 08.10.2017 (updated 05.16.2019)

Interface: OVID

Search: Medline via OVID

Date: 10.08.17

Database: Ovid MEDLINE(R) Epub Ahead of Print, In-Process & Other Non-Indexed Citations, Ovid MEDLINE(R) Daily and Ovid

MEDLINE(R) <1946 to Present>

Search Strategy:

- 
- 1 exp pneumonia/ (85977)
  - 2 pneumonia\*.mp. (187473)
  - 3 ((lung or pulmon\*) adj3 inflammation\*).mp. (12982)
  - 4 inflammatory lung disease\*.mp. (1145)
  - 5 lobitis.mp. (20)
  - 6 peripneumonia\*.mp. (28)
  - 7 pleuropneumonia\*.mp. (3244)
  - 8 (pneumonic adj3 (lung or pleuri\*)).mp. (187)
  - 9 pneumoniti\*.mp. (12993)
  - 10 acute chest syndrome.mp. (925)
  - 11 acute respiratory syndrome.mp. (6465)
  - 12 bronchopneumonia\*.mp. (6283)
  - 13 lung infiltrat\*.mp. (1007)

- 14 legionnaire\* disease\*.mp. (5277)
- 15 pulmonary candidiasis.mp. (111)
- 16 or/1-15 (224155)
- 17 exp animal/ (21731287)
- 18 human/ (17207961)
- 19 17 not 18 (4523326)
- 20 (doptone\* or echograph\* or echogram\* or echoscop\* or echosound\* or sonogram\* or sonograph\* or ultrasonic or ultrasonograph\* or ultrasound\*).mp. (447143)
- 21 (chest or lung or thoracic).mp. (1021945)
- 22 exp Ultrasonography/ (400320)
- 23 20 or 22 (568053)
- 24 21 and 23 (35801)
- 25 16 and 24 (1134)
- 26 25 not 19 (1019)
- 27 remove duplicates from 26 (958)

### Cinahl 08.10.2017 (updated 05.16.2019)

Interface: Ebsco

Search: Cinahl

Date: 10.08.17

Interface - EBSCOhost Research Databases

Search Screen - Advanced Search

Database - CINAHL with Full Text

| #   | Query                                                                                                                                       | Limiters/Expanders            | Results |
|-----|---------------------------------------------------------------------------------------------------------------------------------------------|-------------------------------|---------|
| S21 | S15 AND S20                                                                                                                                 | Search modes - Boolean/Phrase | 99      |
| S20 | S17 AND S19                                                                                                                                 | Search modes - Boolean/Phrase | 4,172   |
| S19 | S16 OR S18                                                                                                                                  | Search modes - Boolean/Phrase | 61,797  |
| S18 | (MH "Ultrasonography+")                                                                                                                     | Search modes - Boolean/Phrase | 38,167  |
| S17 | (chest or lung or thoracic)                                                                                                                 | Search modes - Boolean/Phrase | 79,460  |
| S16 | (doptone* or echograph* or echogram* or echoscop* or echosound* or sonogram* or sonograph* or ultrasonic or ultrasonograph* or ultrasound*) | Search modes - Boolean/Phrase | 50,815  |

|     |                                                                                       |                               |        |
|-----|---------------------------------------------------------------------------------------|-------------------------------|--------|
| S15 | S1 OR S2 OR S3 OR S4 OR S5 OR S6 OR S7 OR S8 OR S9 OR S10 OR S11 OR S12 OR S13 OR S14 | Search modes - Boolean/Phrase | 15,379 |
| S14 | pulmonary candidiasis                                                                 | Search modes - Boolean/Phrase | 2      |
| S13 | legionnaire* disease*                                                                 | Search modes - Boolean/Phrase | 576    |
| S12 | lung infiltrat*                                                                       | Search modes - Boolean/Phrase | 61     |
| S11 | bronchopneumonia*                                                                     | Search modes - Boolean/Phrase | 98     |
| S10 | acute respiratory syndrome                                                            | Search modes - Boolean/Phrase | 1,771  |
| S9  | acute chest syndrome                                                                  | Search modes - Boolean/Phrase | 123    |
| S8  | pneumoniti*                                                                           | Search modes - Boolean/Phrase | 831    |
| S7  | (pneumonic n3 (lung or pleuri*))                                                      | Search modes - Boolean/Phrase | 1      |
| S6  | pleuropneumonia*                                                                      | Search modes - Boolean/Phrase | 3      |
| S5  | peripneumonia*.                                                                       | Search modes - Boolean/Phrase | 0      |
| S4  | lobitis                                                                               | Search modes - Boolean/Phrase | 0      |
| S3  | inflammatory lung disease*                                                            | Search modes - Boolean/Phrase | 62     |
| S2  | ((lung or pulmon*) n3 inflammation*)                                                  | Search modes - Boolean/Phrase | 965    |
| S1  | (MH "Pneumonia+")                                                                     | Search modes - Boolean/Phrase | 11,441 |

## Web of Science 08.10.2017 (updated 05.16.2019)

Interface: Ebsco

Search: Web of Science

Date: 10.08.17

|         |                                             |                                    |         |        |
|---------|---------------------------------------------|------------------------------------|---------|--------|
| Set     |                                             | Edi                                | Combine | Delet  |
| Results | <a href="#">Save History / Create Alert</a> | <a href="#">Open Saved History</a> | t       | Sets   |
|         |                                             |                                    | Set     | e Sets |
|         |                                             |                                    | AND     | O      |
|         |                                             |                                    | s       | R      |

|     |                |                                                                                                                                                                                                               |          |
|-----|----------------|---------------------------------------------------------------------------------------------------------------------------------------------------------------------------------------------------------------|----------|
| # 3 | <b>884</b>     | #2 AND #1<br><i>Indexes=SCI-EXPANDED, SSCI, A&amp;HCI, CPCI-S, CPCI-SSH, ESCI</i><br><i>Timespan=All years</i>                                                                                                | Edi<br>t |
| # 2 | <b>340,710</b> | <b>TOPIC:</b> (echograph*) <b>OR TOPIC:</b> (ultrasonograph*) <b>OR TOPIC:</b> (ultrasound*)<br><i>Indexes=SCI-EXPANDED, SSCI, A&amp;HCI, CPCI-S, CPCI-SSH, ESCI</i><br><i>Timespan=All years</i>             | Edi<br>t |
| # 1 | <b>118,598</b> | <b>TOPIC:</b> (pneumonia) <b>OR TOPIC:</b> (pneumonitis) <b>OR TOPIC:</b> ("acute respiratory syndrome")<br><i>Indexes=SCI-EXPANDED, SSCI, A&amp;HCI, CPCI-S, CPCI-SSH, ESCI</i><br><i>Timespan=All years</i> | Edi<br>t |

## Cochrane 08.10.2017 (updated 05.16.2019)

Interface: Ebsco

Search: Cochrane

Date: 10.08.17

Date Run: 10/08/17 11:42:13.790

Description:

| ID  | Search Hits                                                                                          |
|-----|------------------------------------------------------------------------------------------------------|
| #1  | MeSH descriptor: [Pneumonia] explode all trees 2935                                                  |
| #2  | "lung inflammation*":ti,ab,kw (Word variations have been searched) 123                               |
| #3  | "pulmon* inflammation*":ti,ab,kw (Word variations have been searched) 135                            |
| #4  | "inflammatory lung disease*":ti,ab,kw (Word variations have been searched) 27                        |
| #5  | lobitis:ti,ab,kw (Word variations have been searched) 0                                              |
| #6  | peripneumonia*:ti,ab,kw (Word variations have been searched) 0                                       |
| #7  | "pneumonic lung":ti,ab,kw (Word variations have been searched) 2                                     |
| #8  | "pneumonic pleuri*":ti,ab,kw (Word variations have been searched) 0                                  |
| #9  | pneumonitis:ti,ab,kw (Word variations have been searched) 715                                        |
| #10 | "acute chest syndrome":ti,ab,kw (Word variations have been searched) 120                             |
| #11 | "acute respiratory syndrome":ti,ab,kw (Word variations have been searched) 68                        |
| #12 | "bronchopneumonia*":ti,ab,kw (Word variations have been searched) 254                                |
| #13 | "lung infiltrate*":ti,ab,kw (Word variations have been searched) 109                                 |
| #14 | "legionnaire disease*":ti,ab,kw (Word variations have been searched) 39                              |
| #15 | "pulmonary candidiasis":ti,ab,kw (Word variations have been searched) 1                              |
| #16 | #1 or #2 or #3 or #4 or #5 or #6 or #7 or #8 or #9 or #10 or #11 or #12 or #13 or #14 or #15<br>4300 |

#17 doptone\* or echograph\* or echogram\* or echoscop\* or echosound\* or sonogram\* or sonograph\* or ultrasonic or ultrasonograph\* or ultrasound\*:ti,ab,kw (Word variations have been searched) 24916

#18 MeSH descriptor: [Ultrasonography] explode all trees 12570

#19 #17 or #18 29065

#20 chest or lung or thoracic:ti,ab,kw (Word variations have been searched) 56834

#21 #19 and #20 1597

#22 #21 and #16 29

## e-Appendix 2. Data extraction template.

---

This appendix lists the data extraction template used in this review. The template is an adapted version of the Cochrane data extraction form (1).

### General information

Date extraction completed  
 Name of person extracting data  
 Report title  
 Year of publication  
 Report ID (Author name and number)  
 Published in  
 Publication type  
 Study funding source  
 Possible conflict of interest

### Eligibility

#### Review inclusion criteria:

Published full-text paper?  
 Contains original data from a clinical study?  
 LUS to diagnose pneumonia?  
 LUS performed by non-specialist?  
 Adults (>18 yr.)?  
 Verification of pneumonia by other means than LUS?  
 Eligibility criteria met?

**Type of study****Methods**

Aim of study  
Design  
Start date  
End date  
Duration of participation  
Ethical approval needed/obtained for study?

**Participants (patients):**

Clinical suspicion of CAP?  
Patients > 18 yr.?  
Total no. Participants (patients)  
Withdrawals and exclusions  
Age  
Sex  
Inclusion criteria (patients)  
Exclusion criteria (patients)  
Methods of recruitment of participants (patients)  
Severity of illness  
Co-morbidities  
Other relevant sociodemographics  
Subgroups?  
Subgroups characterisation

**Intervention**

LUS performed to support the diagnosis of CAP  
LUS scanning procedure described?  
Type of ultrasonography scanner  
Verification of pneumonia by what means?  
Subgroup, difference in intervention

**Participants (Non-specialists)**

Number of physicians performing LUS  
Specialty of physician performing LUS  
Training in LUS  
Which type of training did the non-specialist receive?  
How many hours of training did the non-specialist receive?  
Which elements did the training consist of?  
Was the training assessed?  
Who assessed the training?  
Was there an examination/certification at the end of training?  
Experience

Age  
Sex  
Exclusion (physicians)  
Other relevant information

**Setting**

Country  
Location: City/rural  
Location: Hospital/private clinic

**Outcomes****Accuracy of LUS to diagnose CAP**

Diagnostic Accuracy  
Accuracy compared to what?  
LUS Sensitivity  
Specificity  
Other imaging sensitivity

**LUS to assess/predict severity****Time consumption on performing LUS****Harms to patients**

Overdiagnosis and overtreatment  
False positives  
False negatives  
Incidental findings

**Applicability**

Have important populations been excluded from the study?  
Does the study directly address the review question?

**Other information**

Key conclusions by author

e-Table 1. Characteristics of studies and patients.

| e-Table 1. Characteristics of studies and patients. |                       |                       |                      |                    |                                                       |                    |                                                                                                                                                                                         |
|-----------------------------------------------------|-----------------------|-----------------------|----------------------|--------------------|-------------------------------------------------------|--------------------|-----------------------------------------------------------------------------------------------------------------------------------------------------------------------------------------|
| Study                                               | Country               | Location <sup>a</sup> | Study design         | Number of patients | Age <sup>b</sup>                                      | Men/Women          | Inclusion criteria <sup>d</sup>                                                                                                                                                         |
| Amatya 2018 (2)                                     | Nepal                 | City                  | Prospective cohort   | 62                 | Pneumonia: 58.5 ± 13.8.<br>No pneumonia: 61.2 ± 16.3. | 29/33              | SP with at least 3 of: Temp. > 38°C, history of fever, cough, dyspnea, tachypnea (RR>20), sat. < 92%.                                                                                   |
| Benci 1996 (3)                                      | Italy                 | City                  | Prospective cohort   | 80                 | 38.5                                                  | 50/30              | SP on the basis of fever and respiratory signs.                                                                                                                                         |
| Bitar 2018 (4)                                      | Kuwait                | City                  | Prospective cohort   | 11                 | 34.0                                                  | 5/6                | ATS + physical examination with; Temp > 38°C or < 36°C, RR > 22/min, HR > 90 bpm., audible crackles, decreased or bronchial breath sounds, dullness to percussion, or tactile fremitus. |
| Bourcier 2014 (5)                                   | France                | City                  | Prospective cohort   | 144                | 77.6 ± 15.2                                           | 72/72              | SP with at least 3 of: Temp. ≥ 38°C, cough, dyspnea, HR ≥ 100 bpm., Sat. ≤ 92%                                                                                                          |
| Cipollini 2018 (6)                                  | Italy                 | City                  | Retrospective cohort | 128                | 84.8 (78-94)                                          | 61/67              | Age ≥65 years and fever and/or respiratory symptoms. Discharged with final diagnosis of pneumonia, where CXR and LUS were performed on admission.                                       |
| Corradi 2015 (7)                                    | Italy                 | City                  | Prospective cohort   | 32                 | 62 ± 19                                               | 17/15              | SP on basis of: Temp. ≥ 38°C or ≤ 35°C, cough, dyspnea, heart rate > 90 bpm., tachypnea (RR>20), rales or crackles on auscultation, abnormal oxygen sat.                                |
| Cortellaro 2012 (8)                                 | Italy                 | City                  | Prospective cohort   | 120                | 69 ± 18                                               | 77/43              | ATS                                                                                                                                                                                     |
| Fares 2015 (9)                                      | Egypt                 | City                  | Prospective cohort   | 38                 | 61 ± 11.2                                             | 20/10 <sup>c</sup> | ATS. ICU admission on basis of CURB65 score ≥ 3. General and local physical signs suggestive of pneumonia.                                                                              |
| Karimi 2019 (10)                                    | Iran                  | City                  | Prospective cohort   | 280                | 56.5 ± 19.8                                           | 160/120            | Clinical symptoms of pneumonia such as cough, phlegm, shortness of breath, hemoptysis, temp. ≥ 38°C.                                                                                    |
| Liu 2015 (11)                                       | China                 | City                  | Prospective cohort   | 179                | 71.5 (36-88)                                          | 100/79             | ATS                                                                                                                                                                                     |
| Nazerian 2015 (12)                                  | Italy                 | City                  | Prospective cohort   | 285                | 71 ± 14                                               | 133/152            | At least 1 unexplained respiratory complaint among: cough, chest pain, hemoptysis, dyspnea for which a chest CT was ordered.                                                            |
| Pagano 2015 (13)                                    | Italy                 | ND                    | Prospective cohort   | 105                | 59.0                                                  | 59/46              | ATS or crackles or localized absence of breath sounds on lung auscultation.                                                                                                             |
| Parlamento 2009 (14)                                | Italy                 | City                  | Prospective cohort   | 49                 | 60.9 ± 21.8                                           | 31/18              | ATS.                                                                                                                                                                                    |
| Reissig 2012 (15)                                   | Europe                | ND                    | Prospective cohort   | 356                | 63.8 (19-95)                                          | 228/134            | ATS or typical lung auscultation findings and able to undergo CXR in two planes.                                                                                                        |
| Taghizadieh 2015 (16)                               | East Azerbaijan, Iran | City                  | Prospective cohort   | 30                 | 63.8 ± 18.3                                           | 28/2               | ATS.                                                                                                                                                                                    |
| Ticinesi 2016 (17)                                  | Italy                 | City                  | Prospective cohort   | 169                | 83.0 ± 9.2                                            | 80/89              | ATS and age ≥65 years and ≥2 chronic diseases.                                                                                                                                          |
| Unluer 2013 (18)                                    | China                 | ND                    | Prospective cohort   | 72                 | Men: 64.2 ± 12.4                                      | 35/37              | SP on basis of dyspnea, including acute onset dyspnea or worsening of chronic dyspnea.                                                                                                  |

|                                                                                                                                                                                                                                                                                                                                                                                                                                                                                                                                        |  |  |  |  |                       |  |  |
|----------------------------------------------------------------------------------------------------------------------------------------------------------------------------------------------------------------------------------------------------------------------------------------------------------------------------------------------------------------------------------------------------------------------------------------------------------------------------------------------------------------------------------------|--|--|--|--|-----------------------|--|--|
|                                                                                                                                                                                                                                                                                                                                                                                                                                                                                                                                        |  |  |  |  | Women: 68.4 ±<br>11.0 |  |  |
| a) ND: Not described.<br>b) Age is expressed according to data from each study as median years ± SD OR median years (range).<br>c) Only stated for patients positive for pneumonia.<br>d) SP: Suspected pneumonia; Temp: Temperature; RR: Respiratory rate; Sat: Oxygen saturation; ATS = Signs and symptoms suggestive of pneumonia according to American Thoracic Society guidelines (cough, pleuritic pain, sputum production, fever, dyspnea); HR: Heart rate; Bpm: Beats per minute; CXR: Chest X-ray; LUS: Lung ultrasonography; |  |  |  |  |                       |  |  |

---

## e-Table 2. Procedure and characteristics of LUS.

---

| e-Table 2. Procedure and characteristics of LUS. |                                                                                                                          |                                                                                                                                                                                                                                         |                                                                                                                                                                                                       |                                            |
|--------------------------------------------------|--------------------------------------------------------------------------------------------------------------------------|-----------------------------------------------------------------------------------------------------------------------------------------------------------------------------------------------------------------------------------------|-------------------------------------------------------------------------------------------------------------------------------------------------------------------------------------------------------|--------------------------------------------|
| Study                                            | Ultrasonography device                                                                                                   | Areas examined                                                                                                                                                                                                                          | Definition of pneumonia on LUS                                                                                                                                                                        | LUS operator blinded to reference standard |
| Amatya 2018 (2)                                  | A Sonosite M Turbo (Fujifilm Sonosite, Inc.) with a curvilinear probe.                                                   | Each hemithorax divided into five areas: Two anterior, two lateral and one posterior. A total of 10 areas bilaterally.                                                                                                                  | Presence of unilateral B lines or subpleural lung consolidation.                                                                                                                                      | Yes                                        |
| Benci 1996 (3)                                   | Ansaldo AU-560 with convex probe of 3.5 MHz.                                                                             | Medio-lateral anterior and posterior intercostal imaging.                                                                                                                                                                               | Presence of paranchymatous-like hypoechoic lesions indicative of alveolar pneumonia.                                                                                                                  | Unclear                                    |
| Bitar 2018 (4)                                   | GE Vivid S6N with a phased-array 5-MHz probe                                                                             | Each hemithorax divided into five areas: Two anterior, two lateral and one posterior. A total of 10 areas bilaterally.                                                                                                                  | Presence of lung consolidation attaching to the pleural (subpleural) presenting tissue-like pattern or focal interstitial syndrome (focal distribution of B lines).                                   | Yes                                        |
| Bourcier 2014 (5)                                | Portable US device SONOSITE M TURBO with convex 3.5 MHz probe.                                                           | Examination of 8 areas of the chest wall in accordance with international guidelines (reference not reported in study)                                                                                                                  | Presence of a unilateral or bilateral alveolar-interstitial syndrome defined as disappearance of the pleural line associated with aeric or water bronchograms within an image of tissue echogenicity. | Yes                                        |
| Cipollini 2018 (6)                               | Mindray M7 portable device using a 3.5 MHz convex probe.                                                                 | A systematic examination of intercostal spaces was performed anteriorly                                                                                                                                                                 | Presence of a hypoechoic solid area with shred margins indicative for consolidation.                                                                                                                  | Unclear                                    |
| Corradi 2015 (7)                                 | Logiq-e unit (GE Healthcare) with broadband convex-array probe at 4 MHz and high frequency linear-array probe at 10 MHz. | Each hemithorax was scanned over every intercostal space along the conventional parasternal, midclavicular, axillary, and paravertebral lines.                                                                                          | Presence, distribution and extent of artifacts suggestive of interstitial involvement, pleural line abnormalities and alveolar consolidation.                                                         | Yes                                        |
| Cortellaro 2012 (8)                              | Esaote Medical Systems, 3.5-5 MHz convex probe.                                                                          | Each hemithorax divided into five areas: Two anterior, two lateral and one posterior. A total of 10 areas bilaterally.                                                                                                                  | Presence of subpleural lung consolidation, presenting a tissular pattern.                                                                                                                             | Yes                                        |
| Fares 2015 (9)                                   | Sonoescape B5 with 3- to 6 MHz convex probe.                                                                             | Longitudinal and oblique scans of the anterior, lateral and posterior chest wall. The probe was set perpendicular, oblique, and parallel to the ribs. A total of 12 areas bilaterally.                                                  | Presence of subpleural lung consolidation presenting as a tissular pattern, air bronchograms with or without pleural effusion.                                                                        | Unclear                                    |
| Karimi 2019 (10)                                 | Samsung HM70A device with a curved 3.5 – 5 MHz probe                                                                     | Each hemithorax divided into anterior (from the parasternal line to the anterior axillary line), lateral (between the posterior and middle axillary lines), and posterior (from the posterior axillary line to the paravertebral line). | Presence of air bronchogram, fluid bronchogram, pleural effusion, b lines (comet tail sign), or subpleural consolidation.                                                                             | Yes                                        |
| Liu 2015 (11)                                    | Sonosite M-Turbo with 3.5- 5 MHz convex array probe.                                                                     | Each intercostal space in the mid-clavicular line, anterior axillary line, midaxillary line, and paravertebral line, from lung apex to the diaphragm.                                                                                   | Presence of; 1) Consolidation, 2) Focal interstitial pattern, 3) $\geq 2$ Subpleural lesions or 4) $\geq 5$ Intercostal spaces with pleural-line abnormalities.                                       | Yes                                        |
| Nazerian 2015 (12)                               | MyLab30 Gold (Esaote) and HD7 (Philips).                                                                                 | Each hemithorax divided into anterior-lateral areas (extending from parasternal to posterior axillary line) and posterior areas (from the posterior axillary to paravertebral line). A total of 4 areas bilaterally.                    | Presence of at least one subpleural lung consolidations with tissue-like or anechoic pattern and blurred, irregular margins.                                                                          | Yes                                        |
| Pagano 2015 (13)                                 | C60 Sonosite Micro Maxx with 2-5 MHz convex probe.                                                                       | Each hemithorax divided into 4 areas; 1) upper anterior, 2) lower anterior, 3) upper posterior, 4) lower posterior. A total of 8 areas bilaterally.                                                                                     | Presence of 1) Alveolar syndrome: Image of tissue echogenicity associated with aerial bronchogram or 2) Focal interstitial syndrome: Presence of 3 or more B- lines in a single lung area.            | Yes                                        |
| Parlamento 2009 (14)                             | Megas CVX, Esaote Medical Systems, with convex 3.5-5 MHz probe.                                                          | Each hemithorax divided into 5 areas: 1) Two anterior, 2) Two lateral, 3) One posterior. A total of 10 areas bilaterally.                                                                                                               | Presence of subpleural lung consolidation with evidence of static or dynamic air bronchograms.                                                                                                        | Yes                                        |

|                          |                                                                                       |                                                                                                                                                                                                                                                                   |                                                                                                                                                                                                                                                                                                         |         |
|--------------------------|---------------------------------------------------------------------------------------|-------------------------------------------------------------------------------------------------------------------------------------------------------------------------------------------------------------------------------------------------------------------|---------------------------------------------------------------------------------------------------------------------------------------------------------------------------------------------------------------------------------------------------------------------------------------------------------|---------|
| Reissig<br>2012 (15)     | Machines not reported; 5- or 3.5 MHz convex probe, occasionally 7.5 MHz linear probe. | Systematically all intercostal spaces.                                                                                                                                                                                                                            | Unclear definition. Number, shape and size of pneumonic lesions were reported and incidence of necrotic areas, positive air bronchogram, fluid bronchogram, and local and basal pleural effusion was reported.                                                                                          | Yes     |
| Taghizadieh<br>2015 (16) | LOGIQ 200 (GE Healthcare) with convex 3.5 MHz probe.                                  | Not described                                                                                                                                                                                                                                                     | Not described                                                                                                                                                                                                                                                                                           | Unclear |
| Ticinesi<br>2016 (17)    | Acuson X300 5.0 (Siemens) with convex 2-5 MHz probe.                                  | Each hemithorax divided into anterior-lateral areas (extending from parasternal to posterior axillary line) and posterior areas (from the posterior axillary to paravertebral line). Each area divided into upper and lower half. A total of 8 areas bilaterally. | Presence of tissue-like echogenicity associated with dynamic air bronchograms, defined as punctiform or linear hyperechoic artifacts with centrifugal inspiratory dynamicity.                                                                                                                           | Yes     |
| Unluer<br>2013 (18)      | M7 model ultrasound machine with 3.6 MHz microconvex probe.                           | Each hemithorax divided into four areas (upper, anterior, lower, lateral and posterior) and four points (two in the anterior zone, one lateral and one posterior). A total of 8 areas bilaterally.                                                                | Presence of alveolar consolidation defined as: 1) A tissue-like pattern with regular trabeculations reminiscent of the liver, 2) Demonstration of the shred sign in longitudinal view with an uneven surface of the lung line, 3) Detection of unilateral localized B lines based on the BLUE protocol. | Yes     |

## e-Table 3. QUADAS-2 quality assessment.

This e-table lists the Quality Assessment of Diagnostic Accuracy Studies 2 (QUADAS-2). Each domain is represented in a bar with the proportion of studies considered high risk (red), low risk (green), or unclear (yellow). The same applies to applicability concerns.

| e-Table 3. QUADAS-2 quality assessment. |                   |            |                    |                 |                              |            |                    |
|-----------------------------------------|-------------------|------------|--------------------|-----------------|------------------------------|------------|--------------------|
| Study                                   | Risk of bias      |            |                    |                 | Concerns about applicability |            |                    |
|                                         | Patient selection | Index test | Reference standard | Flow and timing | Patient selection            | Index test | Reference standard |
| Amatya 2018 (2)                         | +                 | +          | +                  | +               | +                            | +          | +                  |
| Benci 1996 (3)                          | ?                 | ?          | ?                  | -               | +                            | ?          | +                  |
| Bitar 2018 (4)                          | +                 | +          | ?                  | -               | ?                            | +          | +                  |
| Bourcier 2014 (5)                       | +                 | +          | ?                  | -               | +                            | +          | +                  |
| Cipollini 2018 (6)                      | ?                 | ?          | ?                  | -               | +                            | +          | +                  |
| Corradi 2015 (7)                        | -                 | +          | +                  | +               | -                            | +          | +                  |
| Cortellaro 2012 (8)                     | +                 | +          | +                  | +               | +                            | ?          | +                  |
| Fares 2015 (9)                          | +                 | ?          | ?                  | -               | +                            | ?          | +                  |
| Karimi 2019 (10)                        | -                 | +          | +                  | +               | +                            | +          | +                  |
| Liu 2015 (11)                           | +                 | +          | +                  | +               | +                            | +          | +                  |
| Nazerian 2015 (12)                      | -                 | +          | +                  | +               | -                            | +          | +                  |
| Pagano 2015 (13)                        | +                 | +          | +                  | ?               | +                            | +          | +                  |
| Parlamento 2009 (14)                    | +                 | +          | +                  | -               | +                            | +          | +                  |
| Reissig 2012 (15)                       | +                 | +          | +                  | -               | +                            | ?          | +                  |
| Taghizadieh 2015 (16)                   | -                 | -          | +                  | +               | +                            | ?          | +                  |
| Ticinesi 2016 (17)                      | -                 | +          | +                  | -               | +                            | +          | +                  |
| Unluer 2013 (18)                        | -                 | +          | +                  | -               | +                            | +          | +                  |

## References

1. Sambunjak D CM, Watts C. Module 4: Selecting studies and collecting data. *Cochrane Interactive Learning: Conducting an Intervention Review*. Oxford: Cochrane; 2017 [Available from: <https://training.cochrane.org/interactivelarning/module-4-selecting-studies-and-collecting-data>].
2. Amatya Y, Rupp J, Russell FM, Saunders J, Bales B, House DR. Diagnostic use of lung ultrasound compared to chest radiograph for suspected pneumonia in a resource-limited setting. *Int J Emerg Med*. 2018;11(1):8.
3. Benci A, Caremani M, Menchetti D, Magnolfi A. Sonographic diagnosis of pneumonia and bronchopneumonia. *European Journal of Ultrasound* [Internet]. 1996; 4(3):[169-76 pp.]. Available from: <http://onlinelibrary.wiley.com/o/cochrane/clcentral/articles/916/CN-00168916/frame.html>.

4. Bitar ZI, Maadarani OS, El-Shably AM, Al-Ajmi MJ. Diagnostic accuracy of chest ultrasound in patients with pneumonia in the intensive care unit: a single-hospital study. *Health Science Reports*. 2019;2(1):e102.
5. Bourcier JE, Paquet J, Seinger M, Gallard E, Redonnet JP, Cheddadi F, et al. Performance comparison of lung ultrasound and chest x-ray for the diagnosis of pneumonia in the ED. *Am J Emerg Med*. 2014;32(2):115-8.
6. Cipollini F, Mirauta CM. Bedside lung ultrasound in the diagnosis of pneumonia in very old patients. *Italian Journal of Medicine*. 2018;12(2):126-30.
7. Corradi F, Brusasco C, Garlaschi A, Paparo F, Ball L, Santori G, et al. Quantitative analysis of lung ultrasonography for the detection of community-acquired pneumonia: a pilot study. *BioMed Research International*. 2015;2015:no pagination.
8. Cortellaro F, Colombo S, Coen D, Duca PG. Lung ultrasound is an accurate diagnostic tool for the diagnosis of pneumonia in the emergency department. *Emergency Medicine Journal*. 2012;29(1):19-23.
9. Fares Auf MDAA-N, M.D.; Moustafa Zedan, M.D.; Mohammad Al-Sokromi, M.Sc. Role of transthoracic ultrasound in detection of pneumonia in ICU patients. *Medical Journal of Cairo University*. 2015;83(No 1, Juni):307-14.
10. Karimi E. Comparing sensitivity of ultrasonography and plain chest radiography in detection of pneumonia; a diagnostic value study. *Archives of Academic Emergency Medicine*. 2019;7(1):e8.
11. Liu X-l, Lian R, Tao Y-k, Gu C-d, Zhang G-q. Lung ultrasonography: an effective way to diagnose community-acquired pneumonia. *Emergency Medicine Journal*. 2015;32(6):433-8.
12. Nazerian P, Volpicelli G, Vanni S, Gigli C, Betti L, Bartolucci M, et al. Accuracy of lung ultrasound for the diagnosis of consolidations when compared to chest computed tomography. *Am J Emerg Med*. 2015;33(5):620-5.
13. Pagano A, Numis FG, Visone G, Pirozzi C, Masarone M, Olibet M, et al. Lung ultrasound for diagnosis of pneumonia in emergency department. *Internal and Emergency Medicine*. 2015;10(7):851-4.
14. Parlamento S, Copetti R, Di Bartolomeo S. Evaluation of lung ultrasound for the diagnosis of pneumonia in the ED. *Am J Emerg Med*. 2009;27(4):379-84.
15. Reissig A, Copetti R, Mathis G, Mempel C, Schuler A, Zechner P, et al. Lung ultrasound in the diagnosis and follow-up of community-acquired pneumonia: a prospective, multicenter, diagnostic accuracy study. *Chest*. 2012;142(4):965-72.
16. Taghizadieh A, Ala A, Rahmani F, Nadi A. Diagnostic accuracy of chest x-ray and ultrasonography in detection of community acquired pneumonia; a brief report. *Emergency*. 2015;3(3):114-6.
17. Ticinesi A, Lauretani F, Nouvenne A, Mori G, Chiussi G, Maggio M, et al. Lung ultrasound and chest x-ray for detecting pneumonia in an acute geriatric ward. *Medicine*. 2016;95(27):e4153.
18. Unluer EE, Karagoz A, Senturk GO, Karaman M, Olow KH, Bayata S. Bedside lung ultrasonography for diagnosis of pneumonia. *Hong Kong Journal of Emergency Medicine*. 2013;20(2):98-104.
